# Supplementary material for: Therapeutic effect of gold nanoparticles on DSS-induced ulcerative colitis in mice with reference to interleukin-17 expression
Source: PubMed Central journal article supplement (PMC6629650; doi:10.1038/s41598-019-46671-1), 2019-07-15
Supplement: 41598_2019_46671_MOESM1_ESM.pdf [file 41598_2019_46671_MOESM1_ESM.pdf]

**Therapeutic effect of gold nanoparticles on DSS-induced ulcerative colitis in mice with reference to interleukin-17 expression**

Amira M. Abdelmegid<sup>1</sup>, Fadia K. Abdo<sup>1</sup>, Fayza E.Ahmed<sup>1</sup>, Asmaa A.A. Kattaia <sup>1\*</sup>

<sup>1</sup> Department of Histology and Cell Biology, Faculty of Medicine, Zagazig University

\* Corresponding Author

Tel.: +201220723273

E-mail addresses: [asmaaalhosiny7@gmail.com](mailto:asmaaalhosiny7@gmail.com); [ehabmohomar@yahoo.com](mailto:ehabmohomar@yahoo.com)

Postal address: Faculty of Medicine, Zagazig University, Zagazig, Asharquia, Egypt. Postal code: 44519

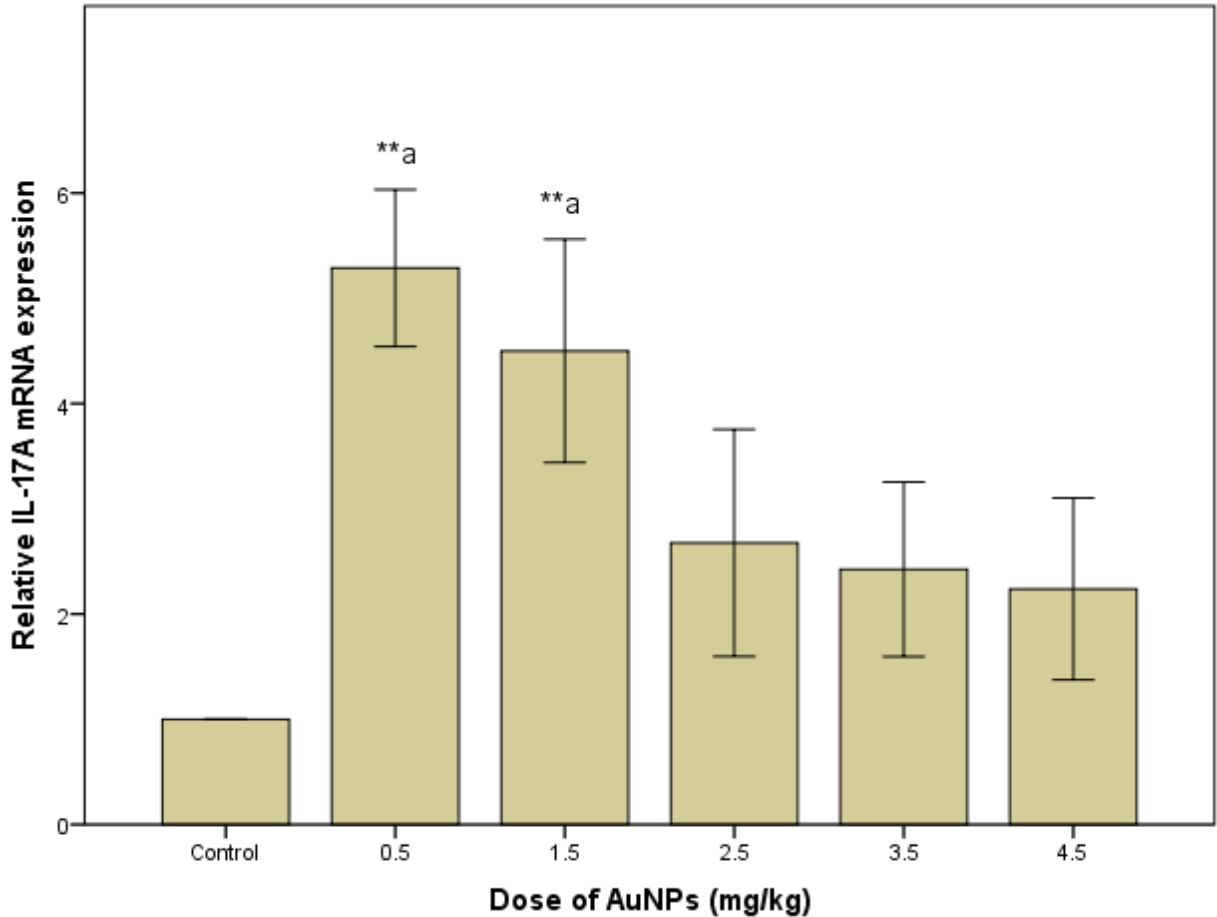

**Supplementary figure 1.** Real-time PCR analysis of IL-17A expression levels in the colons after administration of AuNPs at different concentrations. Values are estimated as a fold-increase compared to IL-17A expression in the calibrator control which is equal to 1. a: *P* compared with control group; Asterisks \*\* denote  $p < 0.001$ ;  $n = 6$ .
